# Supplementary material
Source: HighWire-hosted journal article supplement (https://casereports.bmj.com/content/13/1/e232253)

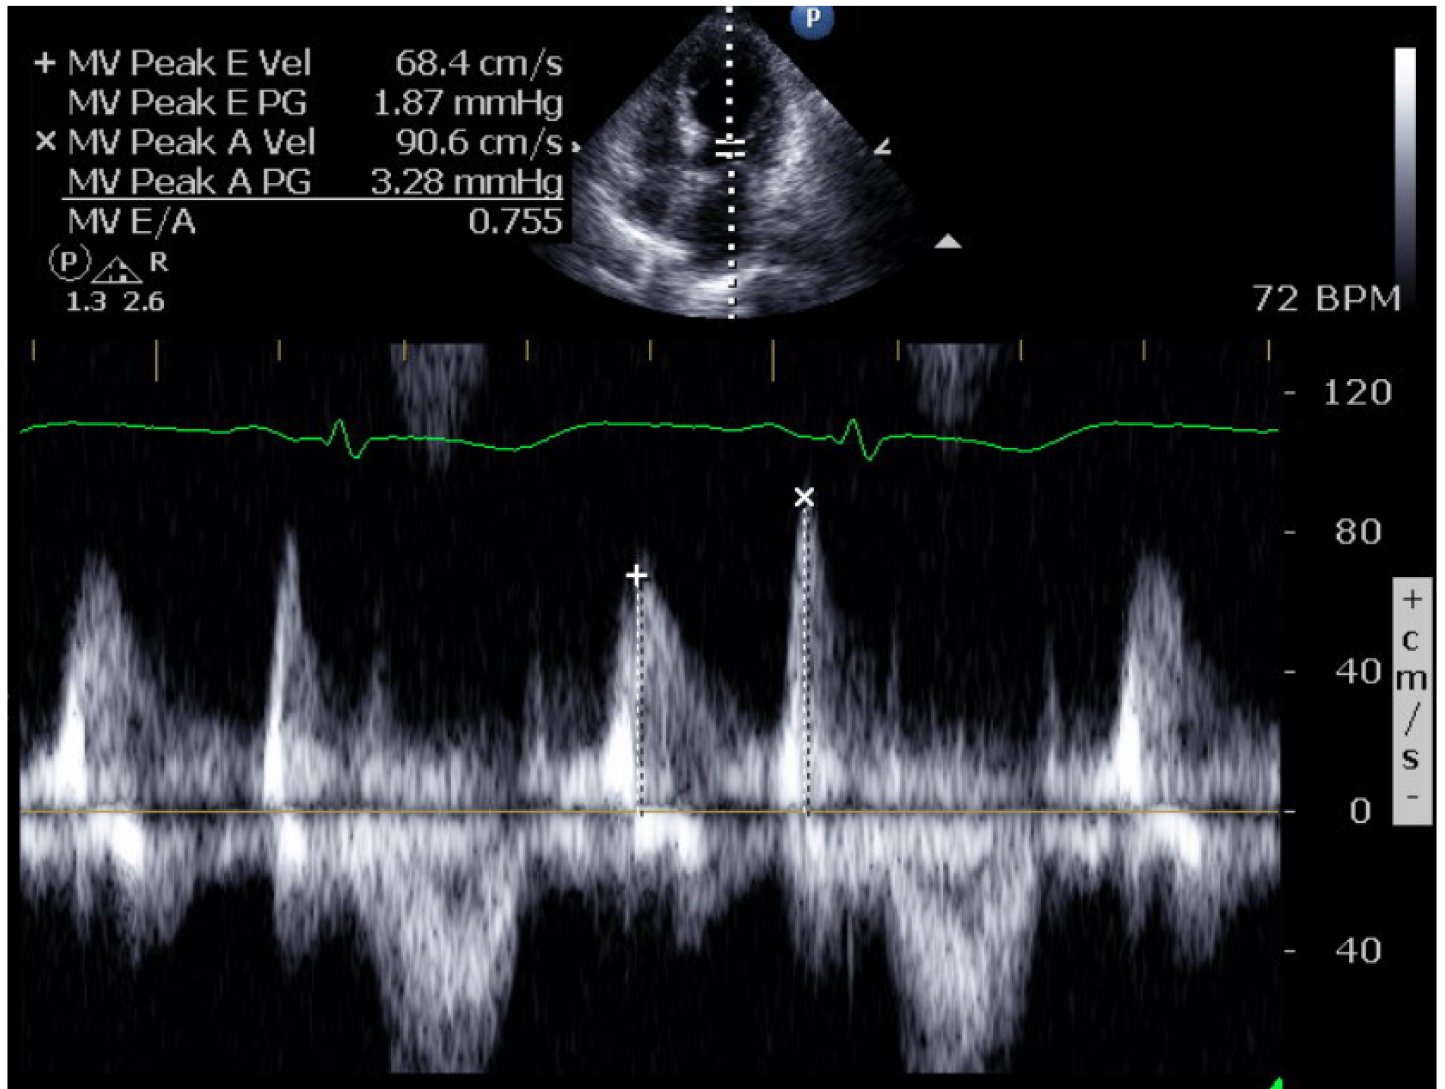

Supplement: inline-supplementary-material-1 [file inline-supplementary-material-1.pdf]
